# Supplementary material for: Genetic Diversity and Population Structure of Leishmania infantum in Morocco as Revealed by Multilocus Sequence Typing (MLST) Approach
Source: MDPI journal article supplement (doi:10.3390/pathogens12060785), 2023-05-31
Supplement: s1 [file s1]

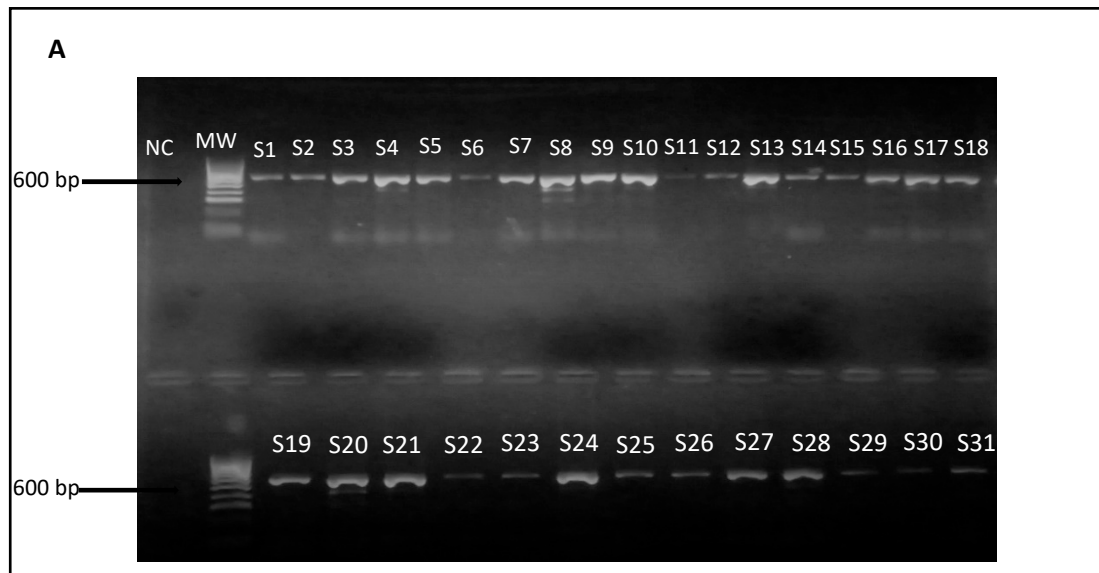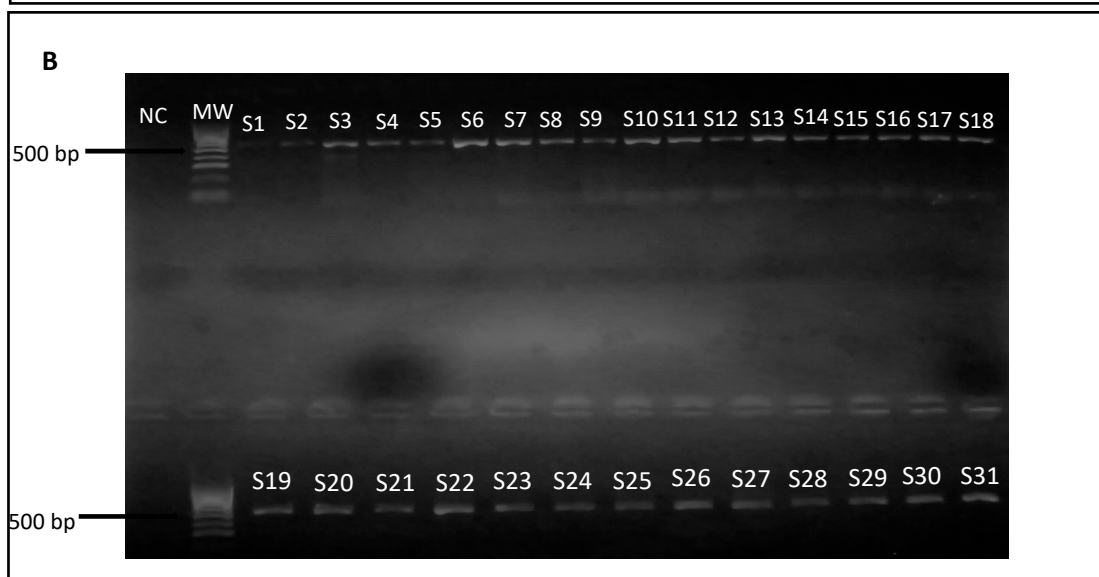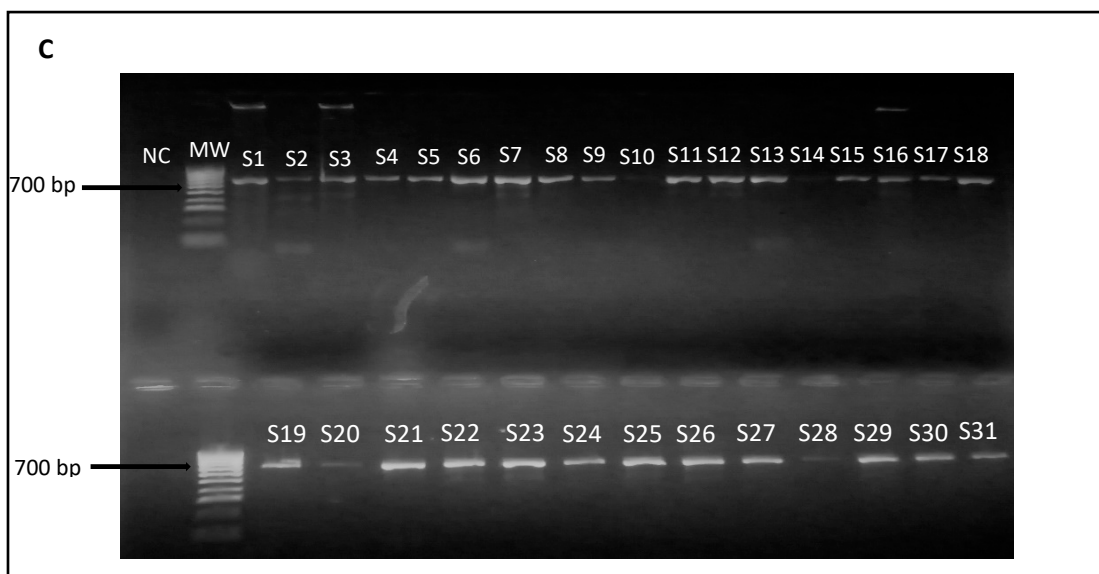

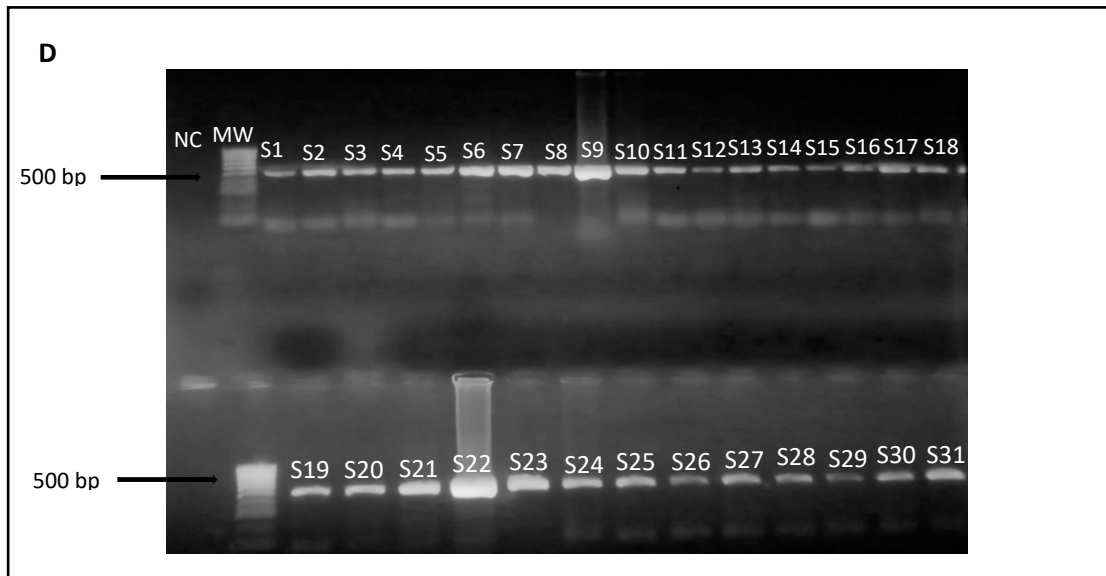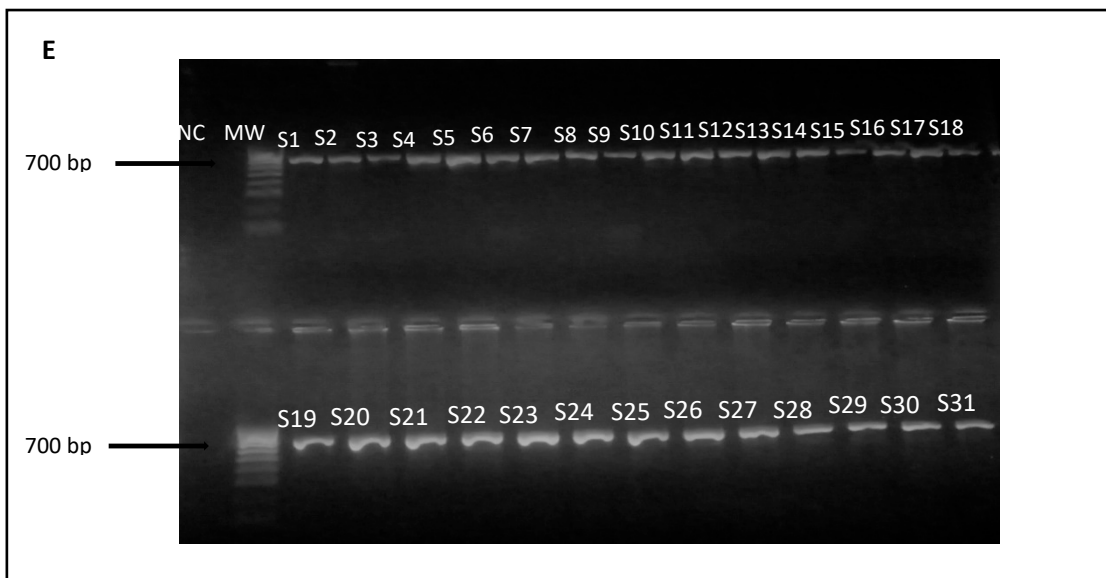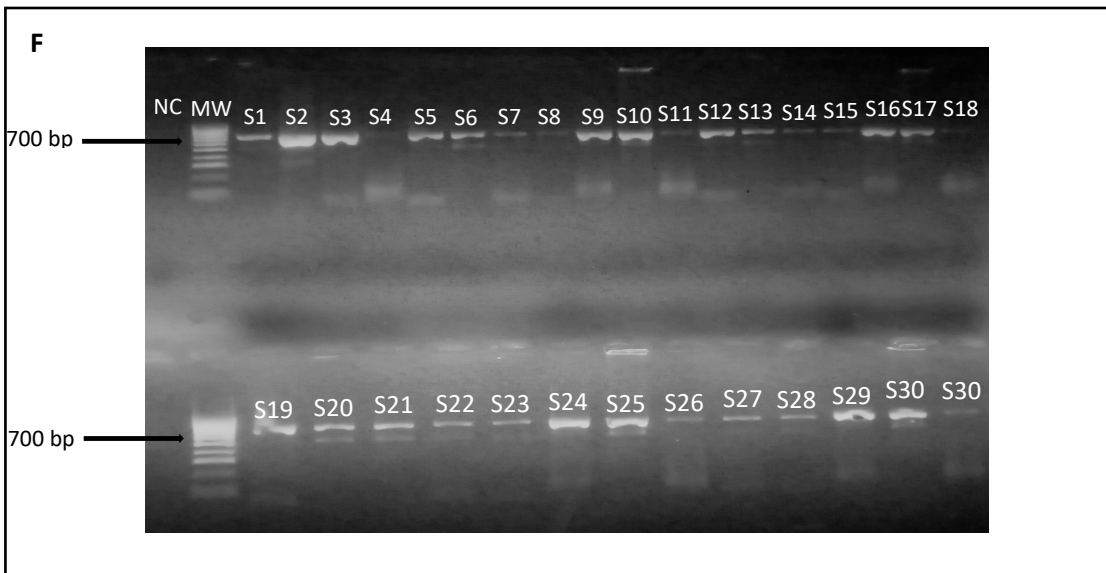

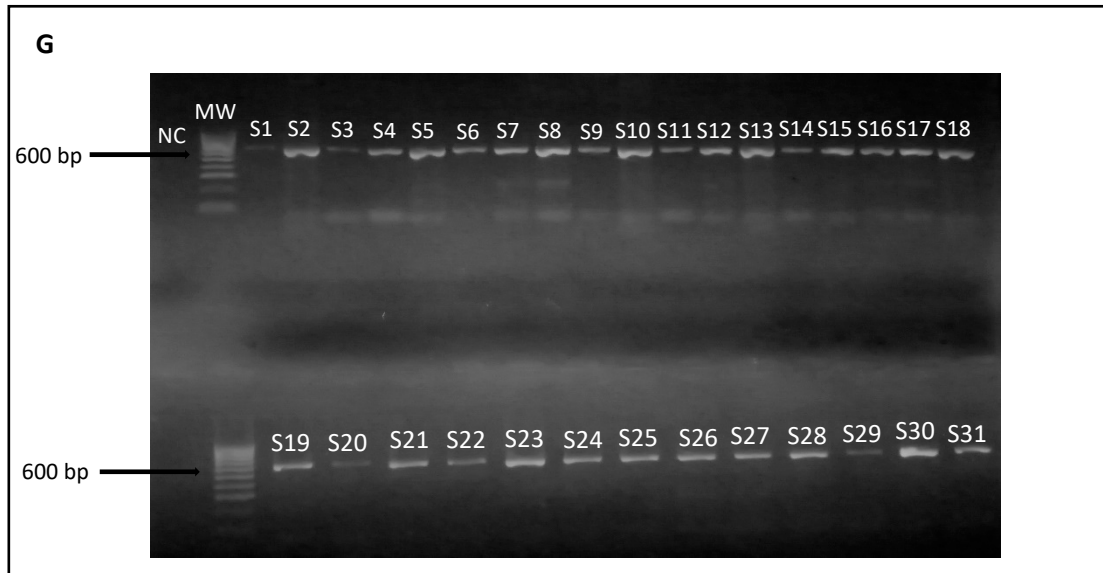

**Figure S1.** Agarose gel profiles of MLST genes: (A) *alat*: 589; (B) *pgm*: 529; (C) *me*: 687 bp; (D) *gpi*: 500 bp; (E) *pgd*: 697 bp; (F) *g6pd*: 684 bp; (G) *fh* 604 bp; and NC: negative control; MW: 100 bp molecular-weight marker.
